# Supplementary material
Source: Springer Nature journal article supplement (http://www.springermedizin.de/resource/supplementary/12887_2011_526_MOESM5_ESM.pdf/9475094)

**Percent**

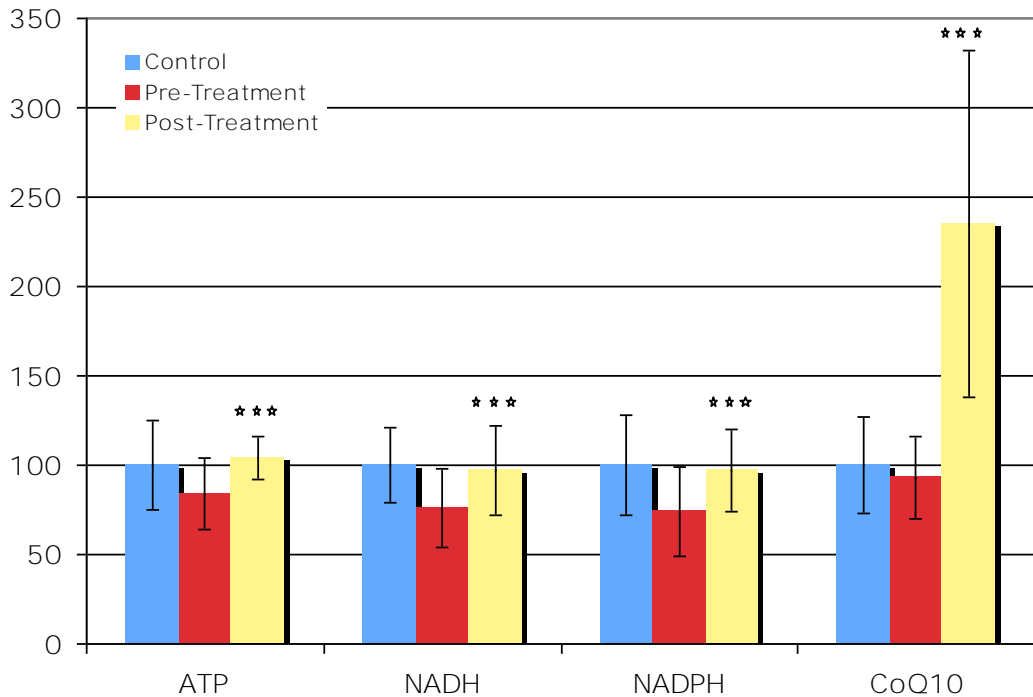

Supplement: MOESM5 [file 9475094]
